# Supplementary material
Source: publisher figshare collection journal article supplement (https://sage.figshare.com/ndownloader/files/17961650)
Supplement: Supplementary file 1 [file 17961650]

Table 1

*Study 2: Mediation analysis of the relationship between pre-offense and current closeness, mediated by offense perceptions and forgiveness.*

|                               | <i>B</i> | <i>SE</i> | <i>t</i> | <i>p</i> | 95% CI |       |
|-------------------------------|----------|-----------|----------|----------|--------|-------|
| <b>Model 1</b>                |          |           |          |          |        |       |
| Pre-Offense Closeness (IV)    |          |           |          |          |        |       |
| IV to M1                      | -0.14    | 0.07      | -1.88    | .06      | -0.28  | 0.01  |
| IV to M2                      | 0.35     | 0.07      | 4.98     | < .0001  | 0.21   | 0.48  |
| Total effect                  | 0.60     | 0.06      | 10.12    | < .0001  | 0.48   | 0.72  |
| Direct effect                 | 0.43     | 0.05      | 8.61     | < .0001  | 0.33   | 0.53  |
| Intention/Responsibility (M1) |          |           |          |          |        |       |
| Direct effect                 | -0.14    | 0.06      | -2.47    | .01      | -0.26  | -0.03 |
| Indirect effect               | 0.02     | 0.02      |          |          | -0.00  | 0.06  |
| Forgiveness (M2)              |          |           |          |          |        |       |
| Direct effect                 | 0.42     | 0.06      | 6.90     | < .0001  | 0.30   | 0.54  |
| Indirect effect               | 0.11     | 0.04      |          |          | 0.06   | 0.19  |
| IV → M1 → M2 → DV             |          |           |          |          |        |       |
| Indirect effect               | 0.03     | 0.02      |          |          | -0.00  | 0.07  |
| <b>Model 2</b>                |          |           |          |          |        |       |
|                               | <i>B</i> | <i>SE</i> | <i>t</i> | <i>p</i> | 95% CI |       |
| Pre-Offense Closeness (IV)    |          |           |          |          |        |       |
| IV to M1                      | -0.07    | 0.07      | -0.89    | .37      | -0.21  | 0.08  |
| IV to M2                      | 0.35     | 0.07      | 4.98     | < .0001  | 0.21   | 0.48  |
| Total effect                  | 0.60     | 0.06      | 10.12    | < .0001  | 0.48   | 0.72  |
| Direct effect                 | 0.44     | 0.05      | 8.70     | < .0001  | 0.34   | 0.54  |
| Perceived Severity (M1)       |          |           |          |          |        |       |
| Direct effect                 | -0.14    | 0.06      | -2.40    | .02      | -0.25  | -0.02 |
| Indirect effect               | 0.01     | 0.02      |          |          | -0.01  | 0.05  |
| Forgiveness (M2)              |          |           |          |          |        |       |
| Direct effect                 | 0.43     | 0.06      | 7.12     | < .0001  | 0.31   | 0.54  |
| Indirect effect               | 0.13     | 0.04      |          |          | 0.06   | 0.22  |
| IV → M1 → M2 → DV             |          |           |          |          |        |       |
| Indirect effect               | 0.01     | 0.02      |          |          | -0.02  | 0.05  |

*Note.* Confidence intervals (95%) were constructed using 5000 bootstrapped samples;  $N = 184$ .

Table 2

*Mediation analyses of the relationships between forgiveness, the PSI, and current closeness.*

|                             | <i>B</i> | <i>SE</i> | <i>t</i> | <i>p</i> | 95% CI |      |
|-----------------------------|----------|-----------|----------|----------|--------|------|
| Forgiveness (IV)            |          |           |          |          |        |      |
| IV to M (a path)            | 0.76     | 0.05      | 15.97    | < .0001  | 0.67   | 0.86 |
| Total effect (c path)       | 0.65     | 0.06      | 11.62    | < .0001  | 0.54   | 0.76 |
| Direct effect (c' path)     | 0.26     | 0.08      | 3.29     | .001     | 0.10   | 0.41 |
| Mediator: PSI               |          |           |          |          |        |      |
| Direct effect (b path)      | 0.52     | 0.08      | 6.59     | < .0001  | 0.36   | 0.67 |
| Indirect effect (ab path)   | 0.39     | 0.08      |          |          | 0.25   | 0.55 |
| Forgiveness (IV)            |          |           |          |          |        |      |
| IV to M (a path)            | 0.65     | 0.06      | 11.62    | < .0001  | 0.54   | 0.76 |
| Total effect (c path)       | 0.76     | 0.05      | 15.97    | < .0001  | 0.67   | 0.86 |
| Direct effect (c' path)     | 0.52     | 0.06      | 9.14     | < .0001  | 0.16   | 0.34 |
| Mediator: Current Closeness |          |           |          |          |        |      |
| Direct effect (b path)      | 0.37     | 0.06      | 6.59     | < .0001  | 0.26   | 0.49 |
| Indirect effect (ab path)   | 0.24     | 0.05      |          |          | 0.16   | 0.34 |

*Notes.* PSI = Parasocial Interaction Scale; confidence intervals (95%) were constructed using 5000 bootstrapped samples;  $P_M = .60$  for PSI as mediator, and  $.32$  for Current Closeness as mediator;  $N = 184$ .
